# Supplementary material
Source: bioRxiv or medRxiv preprint supplement (https://www.biorxiv.org/content/biorxiv/early/2021/04/13/2021.04.13.439610/DC1/embed/media-1.pdf)
Supplement: Supplementary file [file media-1.pdf]

# Supplementary Information

Mediodorsal thalamus is critical for updating during extra-dimensional shifts but not reversals in the attentional set-shifting task

Authors: Zakaria Ouhaz<sup>1</sup>, Brook AL Perry<sup>1</sup>, Kouichi Nakamura<sup>2</sup>, Anna S Mitchell<sup>1</sup>

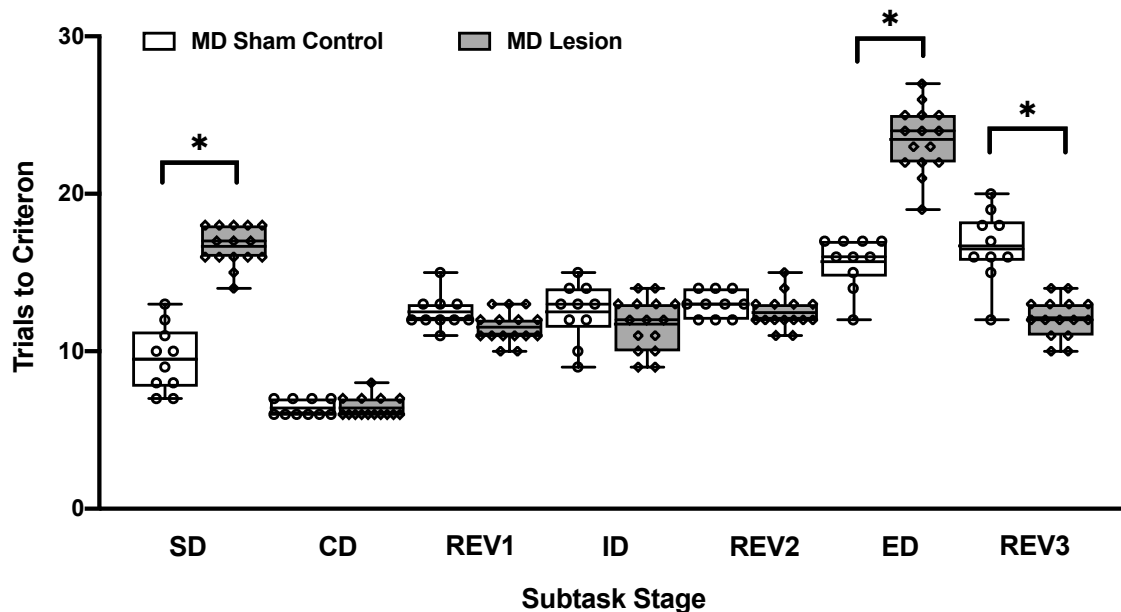

**Supplementary Figure 1.** Boxplots showing mean trials to criterion for individual rats during the postoperative sessions of the attentional set-shifting task. MD lesion rats took significantly more trials to learn the SD and the ED subtasks compared to MD Sham controls ( $p < 0.001$ ). MD Sham control rats also needed more trials to learn the ED, as expected. The MD lesion rats required significantly fewer trials to learn REV3, the reversal occurring immediately after the ED, compared to the MD Sham controls ( $p < 0.001$ ). Box shows 1<sup>st</sup> and 3<sup>rd</sup> quartile and whiskers are the minimum and maximum trials to criterion for individual rats.
